# Supplementary material
Source: PubMed Central journal article supplement (PMC4694112)
Supplement: chest_143_6_1590_ds01.pdf [file chest_143_6_1590_ds01.pdf]

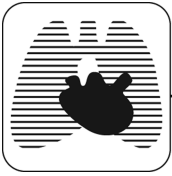

## A Placebo-Controlled, Randomized Trial of Mesenchymal Stem Cells in COPD

Daniel J. Weiss, MD, PhD; Richard Casaburi, PhD, MD, FCCP; Robin Flannery; Michelle LeRoux-Williams, PhD; and Donald P. Tashkin, MD, FCCP

### e-Appendix 1.

#### STUDY DESIGN AND OVERSIGHT

A prospective randomized, double-blind, placebo (vehicle)-controlled design was utilized. Participants were recruited from 6 different institutions in the United States (see acknowledgements section for all participating sites and personnel). The study was approved by the Institutional Review Board (IRB) for each participating center and written informed consent was obtained from each participant. The following are the names and identifying numbers for the IRB committees and protocol numbers for each of the participating sites: Copernicus Group IRB (American Health Research, Spartanburg Medical Research, Upstate Pharmaceutical Research; Principal Investigators: Spangenthal, Fogarty, and Pudi): PHA2-08-071, Los Angeles Biomedical Research Institute IRB (Principal Investigator: Casaburi): 13286-01, David Geffen School of Medicine at UCLA IRB (Principal Investigator: Taskin): 08-04-014-01, The University of Vermont Committees of Human Research (Weiss): IRB 00000485. The trial was registered on ClinicalTrials.gov (ClinicalTrials.gov identifier: NCT00683722).

The study was designed and written by the sponsor (Osiris Therapeutics Inc.). The clinical investigators reviewed the protocol, recruited the patients, and collected the data. The data was monitored, stored, and analyzed by an independent contract firm and was available to all authors for review. An independent data and safety monitoring board which approved all amendments and oversaw conduct of the trial. The first author wrote the first and final

*Online supplements are not copyedited prior to posting.*



draft of the manuscript based on a clinical summary report from the sponsor. All the authors reviewed, contributed to, and approved all subsequent drafts and made the decision to submit the manuscript for publication. The study was conducted in accordance with the amended Declaration of Helsinki ([http://www.wma.net/en/20publications/10\\_policies/b3/](http://www.wma.net/en/20publications/10_policies/b3/)).

### PATIENT SELECTION

Eligible patients were 40-80 years of age with moderate-severe COPD (GOLD Stage II or III (24)), smoking history of >10 pack years (current or former smokers), post-bronchodilator forced volume in 1 second (FEV1) to forced vital capacity (FVC) ratio of <70%, and post-bronchodilator FEV1 between 30% and 70% of predicted value (24). All standard therapeutic regimens for COPD were permitted, including inhaled short and long acting bronchodilators, inhaled corticosteroids, theophylline, leukotriene antagonists, oral prednisone at a stable dose (<20 mg a day), and supplemental oxygen. Major exclusion criteria included asthma and other significant lung diseases apart from COPD, active infection or chronic inflammatory disease, use of immunosuppressive medications including TNF $\alpha$  inhibitors, active malignancy or history of malignancy within the past 5 years, or life expectancy of <6 months (Table 1). Patients who had a COPD exacerbation requiring either antibiotics, oral prednisone at a dose of >20 mg a day, or hospitalization within 4 weeks of screening, who had participated in pulmonary rehabilitation in the three months prior to screening, or who planned to do so within 6 months of enrollment, or who had a change in absolute FEV1 from screening to randomization of >20% or >225 ml were also excluded.

### STUDY DRUG

The active agent was a preparation of ex-vivo cultured adult human mesenchymal stem cells, hMSCs (Osiris Therapeutics, Columbia MD), obtained from donors unrelated and not HLA-matched to recipients. The hMSCs were derived from bone marrow aspirates of donors aged 18-30 years who had been screened and tested according to FDA requirements for Blood and Tissue Based Products. The product lots were manufactured by a scaled

*Online supplements are not copyedited prior to posting.*



adaptation of the technique according to Good Manufacturing Practices (GMP), as described previously (40,41). The process consists of cell expansion for a total of 5 passages in culture medium supplemented with 10% fetal bovine serum that has undergone extensive screening for safety and processing effectiveness. All lots passed established quality release criteria for viral pathogens, mycoplasma, sterility, endotoxin, cell identity, purity, potency and viability. The cells were formulated in Plasma-Lyte® A containing 5% human serum albumin (HSA) and 10% dimethyl sulfoxide (DMSO) and stored at  $\leq 135$  °C in the vapor phase of liquid nitrogen until use. The final cell dose administered was  $100 \times 10^6$  viable cells/infusion, reconstituted with Plasma-Lyte® A in a total volume of 150 mL, for a cell concentration of  $0.67 \times 10^6$  cells/ml.

### STUDY TREATMENTS AND OUTCOMES

Enrolled patients were centrally randomized 1:1 to receive either non HLA-matched allogeneic MSCs (Prochymal®, Osiris Therapeutics, Inc.) or placebo (vehicle) treatment group. The vehicle contained a physiologic electrolyte solution (Baxter Plasma Lyte A®) with 50 g/L human serum albumin (HSA) and 100 mL/L dimethyl sulfoxide (DMSO). Treatment was administered on Days 0, 30, 60, and 90 (Figure 1). MSC dosing was  $100 \times 10^6$  cells/infusion, reconstituted in a total volume of 150 mL of vehicle, and delivered at a maximum rate of  $2.0 \times 10^6$  cells/minute, corresponding to 2-3 ml/minute. Placebo-treated patients received an infusion of vehicle of the same volume as the MSC infusion. Each infusion took approximately one hour to complete.

Participants were subsequently evaluated for safety and efficacy until death, withdrawal, or 2 years after the first study drug infusion, whichever occurred first. Safety was assessed by occurrence of adverse events during either study drug infusion or by physician assessments and laboratory evaluations (serum electrolytes, complete blood counts, liver function tests, urinalyses), echocardiograms, and electrocardiograms during the 2 year follow-up period. A record of hospitalizations, COPD exacerbations, and use of reliever medications was maintained for each patient.

*Online supplements are not copyedited prior to posting.*



Efficacy measures included improvement from baseline in pulmonary function, exercise performance, quality of life and exacerbations in the MSC group as compared to placebo at 1 year) and 2 years. Specific outcomes included: changes in FEV1, FVC, FEV1/FVC (24), total lung capacity by plethysmography (24), single breath carbon monoxide diffusing capacity (25), six minute walk distance (26,27), dyspnea during the six minute walk test (Borg scale) (27), the St. George's Respiratory questionnaire, SGRQ total score (28,29), and global assessment of patient status by the clinical investigators. COPD exacerbations, defined as change in standard medication regimen and/or need for emergency room evaluation or hospital admission for worsening COPD symptoms, were assessed as the time to the first exacerbation and as the ratio of the rate of exacerbations between MSC and placebo treated patients. Circulating levels of TNF $\alpha$ , IFN $\gamma$ , interleukin (IL)-2, transforming growth factor (TGF)  $\beta$ , IL-4, IL-5, IL-10, and C-reactive protein (CRP) were assessed as markers of systemic inflammation (30).

### STATISTICAL METHODS

The number of patients was selected for initial assessment of safety and exploratory evaluation of efficacy in a Phase II investigation. The study was not powered for efficacy. The study randomized 62 patients in a 1:1 ratio of MSCs to placebo. An analysis of covariance (ANCOVA) was performed on FEV1 % predicted change from baseline at 6 months, using FEV1 % predicted at baseline as a covariate. (31). For all other endpoints, statistical analyses were performed using two-sided hypothesis tests, including t-tests, chi-square tests, Wilcoxon rank-sum tests, or Fisher's exact tests, as appropriate, at the 0.05 level of significance (31). Differences in time to first COPD exacerbation and probabilities of being exacerbation free were assessed by Kaplan-Meier methodology and log rank tests (31). Total COPD exacerbations experienced per patient, adjusted per exposure, were compared between treatment groups using a two-sided Mantel-Haenszel chi-square test for ordered categorical data (31).

*Online supplements are not copyedited prior to posting.*



### **e-Appendix 2.**

#### **Participating Sites and Personnel**

##### American Health Research

Alison Hefner, BA, CCRC, Claudia Moreno MSW, CCRC, Selwyn Spangenthal MD, Laurie Thomason, RN, CCRC

##### David Geffen School of Medicine at UCLA

Christopher Cooper, MD, Curniece Gardner, Brian Fedor, Eric Kleeup, MD, Donald P. Tashkin MD, Tisha Wang, MD, Michelle Zeidler, MD.

##### Los Angeles Biomedical Research Institute at Harbor-UCLA Medical Center

Richard Casaburi MD., Leticia Diaz , Renee Indelecato, Rafi Kiledjian , Janos Porszasz

##### Osiris Therapeutics Incorporated (Sponsor)

Michelle Williams PhD, Robin Flannery. The sponsor provided funding for the investigation and was involved in the study conception and design, data interpretation, article revision and final approval of the manuscript.

##### Spartanburg Medical Research

Nicole Crockford, Charles Fogarty MD

##### Upstate Pharmaceutical Research

Tammy Nelms RN CCRC, Betty Pudi RN CCRC, Krishna K. Pudi MD, Julian Williams MD

##### University of Vermont

*Blood Bank:* Nella Bartolai-Drexler, Sharon Busher, Audrey Chafetz, Mark Fung MD, Paulette Hammond, Shelly Hitchcox

*Vermont Lung Center:* Stephanie Burns RN, Laurianne Griffiths RN, Joan Lippmann RN, Daniel J. Weiss MD PhD

*General Clinical Research Center:* Richard Galbraith MD, Joan Bertolet RN, Delana Braves RN, Betsy Cutler RN, Susanna Knoop RN, Nanse Nathan RN, Rachel Stringer RN

##### PharmaNet

PharmaNet Development Group, Inc. 504 Carnegie Center, Princeton, NJ 08540

*Online supplements are not copyedited prior to posting.*

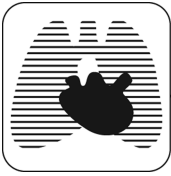

**g-Table 1: Concomitant COPD Medications (Safety Set)**

|                                           | PROCHYMAL<br>(n=30) | PLACEBO<br>(n=32) | TOTAL<br>(n=62)   |
|-------------------------------------------|---------------------|-------------------|-------------------|
| Any COPD medication                       | 27 (90.0%)          | 31 (96.9%)        | 58 (93.5%)        |
| <b>COMBINATION MEDICATIONS</b>            | <b>22 (73.3%)</b>   | <b>25 (78.1%)</b> | <b>47 (75.8%)</b> |
| BUDESONIDE W/FORMOTEROL FUMARATE          | 2 (6.7%)            | 6 (18.8%)         | 8 (12.9%)         |
| COMBIVENT                                 | 6 (20.0%)           | 7 (21.9%)         | 13 (21.0%)        |
| SERETIDE                                  | 17 (56.7%)          | 17 (53.1%)        | 34 (54.8%)        |
| <b>INHALED CORTICOSTEROIDS</b>            | <b>5 (16.7%)</b>    | <b>9 (28.1%)</b>  | <b>14 (22.6%)</b> |
| BECLOMETASONE DIPROPIONATE                | 2 (6.7%)            | 3 (9.4%)          | 5 (8.1%)          |
| BUDESONIDE                                | 2 (6.7%)            | 2 (6.3%)          | 4 (6.5%)          |
| FLUTICASONE PROPIONATE                    | 1 (3.3%)            | 2 (6.3%)          | 3 (4.8%)          |
| MOMETASONE FUROATE                        | 2 (6.7%)            | 2 (6.3%)          | 4 (6.5%)          |
| TRIAMCINOLONE ACETONIDE                   | 1 (3.3%)            | 0 (0.0%)          | 1 (1.6%)          |
| <b>LEUKOTRIENE RECEPTOR ANTAGONISTS</b>   | <b>0 (0.0%)</b>     | <b>1 (3.1%)</b>   | <b>1 (1.6%)</b>   |
| MONTELUKAST SODIUM                        | 0 (0.0%)            | 1 (3.1%)          | 1 (1.6%)          |
| <b>LONG-ACTING BETA AGONISTS</b>          | <b>6 (20.0%)</b>    | <b>3 (9.4%)</b>   | <b>9 (14.5%)</b>  |
| ARFORMOTEROL TARTRATE                     | 0 (0.0%)            | 1 (3.1%)          | 1 (1.6%)          |
| FORMOTEROL FUMARATE                       | 5 (16.7%)           | 3 (9.4%)          | 8 (12.9%)         |
| SALMETEROL XINAFOATE                      | 1 (3.3%)            | 0 (0.0%)          | 1 (1.6%)          |
| <b>LONG-ACTING MUSCARINIC ANTAGONISTS</b> | <b>20 (66.7%)</b>   | <b>18 (56.3%)</b> | <b>38 (61.3%)</b> |
| TIOTROPIUM BROMIDE                        | 20 (66.7%)          | 18 (56.3%)        | 38 (61.3%)        |
| <b>OTHER CORTICOSTEROIDS</b>              | <b>12 (40.0%)</b>   | <b>8 (25.0%)</b>  | <b>20 (32.3%)</b> |
| METHYLPREDNISOLONE                        | 1 (3.3%)            | 1 (3.1%)          | 2 (3.2%)          |
| METHYLPREDNISOLONE ACETATE                | 0 (0.0%)            | 1 (3.1%)          | 1 (1.6%)          |
| METHYLPREDNISOLONE SODIUM SUCCINATE       | 1 (3.3%)            | 0 (0.0%)          | 1 (1.6%)          |
| PREDNISONE                                | 12 (40.0%)          | 8 (25.0%)         | 20 (32.3%)        |
| <b>SHORT-ACTING BETA AGONISTS</b>         | <b>24 (80.0%)</b>   | <b>25 (78.1%)</b> | <b>49 (79.0%)</b> |
| IPRATROPIUM BROMIDE                       | 3 (10.0%)           | 3 (9.4%)          | 6 (9.7%)          |
| LEVOSALBUTAMOL                            | 2 (6.7%)            | 1 (3.1%)          | 3 (4.8%)          |
| LEVOSALBUTAMOL TARTRATE                   | 0 (0.0%)            | 1 (3.1%)          | 1 (1.6%)          |
| SALBUTAMOL                                | 23 (76.7%)          | 22 (68.8%)        | 45 (72.6%)        |
| SALBUTAMOL SULFATE                        | 2 (6.7%)            | 3 (9.4%)          | 5 (8.1%)          |
| <b>SHORT-ACTING MUSCARINIC ANTAGONIST</b> | <b>0 (0.0%)</b>     | <b>1 (3.1%)</b>   | <b>1 (1.6%)</b>   |
| IPRATROPIUM BROMIDE                       | 0 (0.0%)            | 1 (3.1%)          | 1 (1.6%)          |
| <b>SUPPLEMENTAL OXYGEN</b>                | <b>15 (50.0%)</b>   | <b>10 (31.3%)</b> | <b>25 (40.3%)</b> |
| OXYGEN                                    | 15 (50.0%)          | 10 (31.3%)        | 25 (40.3%)        |
| <b>XANTHINES</b>                          | <b>3 (10.0%)</b>    | <b>3 (9.4%)</b>   | <b>6 (9.7%)</b>   |
| THEOPHYLLINE                              | 3 (10.0%)           | 3 (9.4%)          | 6 (9.7%)          |

Notes: The safety set consists of all randomized subjects who received at least one dose of study drug, analyzed according to the treatment they received, regardless of randomization. The subject is counted only once in any medication/category.

*Online supplements are not copyedited prior to posting.*





e-Table 2: Spirometry by Visit (Intent-to-Treat Population)

|                                       |           | PROCHYMAL (n=30) |                      | PLACEBO (n=32) |                      | P-value   |
|---------------------------------------|-----------|------------------|----------------------|----------------|----------------------|-----------|
|                                       |           | Actual Value     | Change from baseline | Actual Value   | Change from baseline |           |
| <b>Screening (Visit 1, Day -30)</b>   |           |                  |                      |                |                      |           |
| FEV <sub>1</sub> (L)                  | N         | 30               |                      | 32             |                      |           |
|                                       | Mean (SD) | 1.23 (0.38)      |                      | 1.36 (0.59)    |                      |           |
|                                       | Median    | 1.15             |                      | 1.11           |                      |           |
|                                       | Min, max  | 0.6, 2.2         |                      | 0.7, 2.7       |                      |           |
| FVC (L)                               | N         | 30               |                      | 32             |                      |           |
|                                       | Mean (SD) | 2.83 (0.70)      |                      | 3.03 (1.11)    |                      |           |
|                                       | Median    | 2.63             |                      | 2.81           |                      |           |
|                                       | Min, max  | 1.7, 4.4         |                      | 1.7, 6.3       |                      |           |
| FEV <sub>1</sub> /FVC                 | N         | 30               |                      | 32             |                      |           |
|                                       | Mean (SD) | 0.43 (0.09)      |                      | 0.45 (0.12)    |                      |           |
|                                       | Median    | 0.43             |                      | 0.42           |                      |           |
|                                       | Min, max  | 0.3, 0.6         |                      | 0.3, 0.7       |                      |           |
| <b>Baseline (Visit 2, Day 0)</b>      |           |                  |                      |                |                      |           |
| FEV <sub>1</sub> (L)                  | N         | 30               |                      | 32             |                      |           |
|                                       | Mean (SD) | 1.20 (0.37)      |                      | 1.38 (0.58)    |                      |           |
|                                       | Median    | 1.14             |                      | 1.21           |                      |           |
|                                       | Min, max  | 0.6, 1.9         |                      | 0.7, 2.7       |                      |           |
| FVC (L)                               | N         | 30               |                      | 32             |                      |           |
|                                       | Mean (SD) | 2.73 (0.61)      |                      | 2.99 (1.06)    |                      |           |
|                                       | Median    | 2.59             |                      | 2.87           |                      |           |
|                                       | Min, max  | 1.7, 4.3         |                      | 1.6, 5.8       |                      |           |
| FEV <sub>1</sub> /FVC                 | N         | 30               |                      | 32             |                      |           |
|                                       | Mean (SD) | 0.44 (0.10)      |                      | 0.46 (0.12)    |                      |           |
|                                       | Median    | 0.44             |                      | 0.44           |                      |           |
|                                       | Min, max  | 0.3, 0.7         |                      | 0.3, 0.7       |                      |           |
| Hb-adjusted DLCO<br>(mL/min/mmHg) [2] | N         | 29               |                      | 32             |                      |           |
|                                       | Mean (SD) | 10.73 (3.46)     |                      | 12.95 (5.10)   |                      |           |
|                                       | Median    | 10.90            |                      | 12.75          |                      |           |
|                                       | Min, max  | 3.53, 16.59      |                      | 5.70, 22.57    |                      |           |
| <b>Visit 3 (Day 10)</b>               |           |                  |                      |                |                      |           |
| FEV <sub>1</sub> (L)                  | N         | 30               | 30                   | 32             | 32                   | 0.279 [1] |
|                                       | Mean (SD) | 1.22 (0.37)      | 0.020 (0.108)        | 1.36 (0.60)    | -0.012 (0.123)       |           |
|                                       | Median    | 1.17             | 0.000                | 1.16           | -0.020               |           |
|                                       | Min, max  | 0.6, 1.9         | -0.13, 0.29          | 0.6, 2.7       | -0.26, 0.21          |           |
| Achieved MCID $\geq$ 100mL            | Yes       | 8 (26.7%)        |                      | 7 (21.9%)      |                      | 0.660 [2] |
|                                       | No        | 22 (73.3%)       |                      | 25 (78.1%)     |                      |           |
| FVC (L)                               | N         | 30               | 30                   | 32             | 32                   | 0.144 [1] |
|                                       | Mean (SD) | 2.82 (0.71)      | 0.091 (0.251)        | 2.98 (1.04)    | -0.006 (0.263)       |           |
|                                       | Median    | 2.77             | 0.06                 | 1.76           | 0.04                 |           |
|                                       | Min, max  | 1.6, 4.3         | -0.37, 0.71          | 1.5, 6.0       | -0.95, 0.41          |           |

Online supplements are not copyedited prior to posting.



e-Table 2: Spirometry by Visit (Intent-to-Treat Population)

|                                    |           | PROCHYMAL (n=30) |                      | PLACEBO (n=32) |                      | P-value   |
|------------------------------------|-----------|------------------|----------------------|----------------|----------------------|-----------|
|                                    |           | Actual Value     | Change from baseline | Actual Value   | Change from baseline |           |
| FEV <sub>1</sub> /FVC              | N         | 30               | 30                   | 32             | 32                   | 0.846 [1] |
|                                    | Mean (SD) | 0.44 (0.10)      | -0.003 (0.024)       | 0.46 (0.13)    | -0.005 (0.038)       |           |
|                                    | Median    | 0.42             | -0.005               | 0.45           | -0.004               |           |
|                                    | Min, max  | 0.3, 0.6         | -0.04, 0.05          | 0.3, 0.7       | -0.09, 0.10          |           |
| Hb-adjusted DLCO (mL/min/mmHg) [2] | N         | 30               | 29                   | 32             | 32                   | 0.872     |
|                                    | Mean (SD) | 10.47 (3.63)     | -0.13 (1.75)         | 12.76 (5.01)   | -0.20 (1.59)         |           |
|                                    | Median    | 9.74             | 0.26                 | 11.90          | 0.04                 |           |
|                                    | Min, max  | 2.62, 18.71      | -6.18, 2.58          | 5.84, 24.25    | -5.89, 1.94          |           |
| <b>Visit 4 (1 month)</b>           |           |                  |                      |                |                      |           |
| FEV <sub>1</sub> (L)               | N         | 30               | 30                   | 32             | 32                   | 0.122 [1] |
|                                    | Mean (SD) | 1.20 (0.40)      | 0.000 (0.115)        | 1.33 (0.58)    | -0.49 (0.130)        |           |
|                                    | Median    | 1.12             | -0.015               | 1.27           | -0.025               |           |
|                                    | Min, max  | 0.6, 2.0         | -0.27, 0.20          | 0.6, 2.7       | -0.36, 0.14          |           |
| Achieved MCID <sub>≥</sub> 100mL   | Yes       | 8 (26.7%)        |                      | 2 (6.3%)       |                      | 0.029 [2] |
|                                    | No        | 22 (73.3%)       |                      | 30 (93.8%)     |                      |           |
| FVC (L)                            | N         | 30               | 30                   | 32             | 32                   | 0.295 [1] |
|                                    | Mean (SD) | 2.73 (0.72)      | 0.003 (0.311)        | 2.91 (0.97)    | -0.78 (0.289)        |           |
|                                    | Median    | 2.61             | -0.005               | 2.77           | -0.015               |           |
|                                    | Min, max  | 1.5, 4.3         | -0.65, 1.09          | 1.7, 5.8       | -0.84, 0.49          |           |
| FEV <sub>1</sub> /FVC              | N         | 30               | 30                   | 32             | 32                   | 0.330 [1] |
|                                    | Mean (SD) | 0.44 (0.10)      | 0.000 (0.029)        | 0.45 (0.12)    | -0.008 (0.037)       |           |
|                                    | Median    | 0.42             | 0.000                | 0.43           | -0.005               |           |
|                                    | Min, max  | 0.3, 0.7         | -0.10, 0.06          | 0.3, 0.7       | -0.11, 0.08          |           |
| Hb-adjusted DLCO (mL/min/mmHg) [2] | N         | 30               | 29                   | 32             | 32                   | 0.095     |
|                                    | Mean (SD) | 9.77 (3.41)      | -0.94 (1.55)         | 12.68 (5.00)   | -0.27 (1.50)         |           |
|                                    | Median    | 9.67             | -0.67                | 12.78          | -0.10                |           |
|                                    | Min, max  | 2.82, 16.01      | -5.20, 1.48          | 4.01, 22.15    | -4.33, 2.48          |           |
| <b>Visit 5 (2 months)</b>          |           |                  |                      |                |                      |           |
| FEV <sub>1</sub> (L)               | N         | 30               | 30                   | 32             | 32                   | 0.530 [1] |
|                                    | Mean (SD) | 1.18 (0.40)      | -0.016 (0.134)       | 1.34 (0.57)    | -0.037 (0.133)       |           |
|                                    | Median    | 1.14             | -0.025               | 1.17           | -0.025               |           |
|                                    | Min, max  | 0.6, 2.2         | -0.32, 0.29          | 0.6, 2.6       | -0.35, 0.18          |           |
| Achieved MCID <sub>≥</sub> 100mL   | Yes       | 5 (16.7%)        |                      | 3 (9.4%)       |                      | 0.392 [2] |
|                                    | No        | 25 (83.3%)       |                      | 29 (90.6%)     |                      |           |
| FVC (L)                            | N         | 30               | 30                   | 32             | 32                   | 0.731 [1] |
|                                    | Mean (SD) | 2.71 (0.68)      | -0.023 (0.253)       | 2.94 (0.92)    | -0.048 (0.314)       |           |
|                                    | Median    | 2.68             | -0.005               | 2.82           | -0.005               |           |
|                                    | Min, max  | 1.4, 4.2         | -0.63, 0.70          | 1.4, 5.1       | -1.03, 0.46          |           |
| FEV <sub>1</sub> /FVC              | N         | 30               | 30                   | 32             | 32                   | 0.478 [1] |
|                                    | Mean (SD) | 0.44 (0.10)      | -0.001 (0.037)       | 0.46 (0.13)    | -0.008 (0.038)       |           |
|                                    | Median    | 0.41             | -0.003               | 0.43           | -0.01                |           |
|                                    | Min, max  | 0.3, 0.7         | -0.08, 0.08          | 0.3, 0.7       | -0.10, 0.08          |           |
| Hb-adjusted DLCO (mL/min/mmHg) [2] | N         | 29               | 28                   | 32             | 32                   | 0.037     |
|                                    | Mean (SD) | 9.71 (3.82)      | -0.92 (1.91)         | 13.06 (5.27)   | 0.11 (1.83)          |           |
|                                    | Median    | 9.24             | -0.85                | 11.84          | 0.17                 |           |
|                                    | Min, max  | 1.86, 17.25      | -7.24, 2.02          | 6.35, 25.57    | -2.86, 3.54          |           |

Online supplements are not copyedited prior to posting.





e-Table 2: Spirometry by Visit (Intent-to-Treat Population)

|                                    |           | PROCHYMAL (n=30) |                      | PLACEBO (n=32) |                      | P-value   |
|------------------------------------|-----------|------------------|----------------------|----------------|----------------------|-----------|
|                                    |           | Actual Value     | Change from baseline | Actual Value   | Change from baseline |           |
| <b>Visit 6 (3 months)</b>          |           |                  |                      |                |                      |           |
| FEV <sub>1</sub> (L)               | N         | 30               | 30                   | 32             | 32                   | 0.309 [1] |
|                                    | Mean (SD) | 1.17 (0.37)      | -0.033 (0.136)       | 1.31 (0.59)    | -0.072 (0.156)       |           |
|                                    | Median    | 1.14             | -0.015               | 1.20           | -0.060               |           |
|                                    | Min, max  | 0.6, 1.8         | -0.33, 0.34          | 0.7, 2.7       | -0.55, 0.24          |           |
| Achieved MCID $\geq$ 100mL         | Yes       | 4 (13.3%)        |                      | 2 (6.3%)       |                      | 0.346 [2] |
|                                    | No        | 26 (86.7%)       |                      | 30 (93.8%)     |                      |           |
| FVC (L)                            | N         | 30               | 30                   | 32             | 32                   | 0.372 [1] |
|                                    | Mean (SD) | 2.67 (0.67)      | -0.064 (0.316)       | 2.85 (0.95)    | -0.139 (0.343)       |           |
|                                    | Median    | 2.68             | -0.03                | 2.67           | -0.035               |           |
|                                    | Min, max  | 1.5, 4.0         | -0.69, 0.64          | 1.3, 5.5       | -0.98, 0.55          |           |
| FEV <sub>1</sub> /FVC              | N         | 30               | 30                   | 32             | 32                   | 0.390 [1] |
|                                    | Mean (SD) | 0.44 (0.11)      | 0.001 (0.035)        | 0.46 (0.12)    | -0.007 (0.037)       |           |
|                                    | Median    | 0.41             | -0.005               | 0.43           | -0.007               |           |
|                                    | Min, max  | 0.3, 0.7         | -0.06, 0.08          | 0.3, 0.7       | -0.10, 0.08          |           |
| Hb-adjusted DLCO (mL/min/mmHg) [2] | N         | 28               | 27                   | 32             | 32                   | 0.082     |
|                                    | Mean (SD) | 9.74 (3.78)      | -1.29 (2.32)         | 12.61 (5.61)   | -0.34 (1.77)         |           |
|                                    | Median    | 7.98             | -0.75                | 11.18          | -0.17                |           |
|                                    | Min, max  | 5.06, 16.86      | -7.37, 2.14          | 4.99, 24.20    | -4.31, 4.98          |           |
| <b>Visit 7 (4 months)</b>          |           |                  |                      |                |                      |           |
| FEV <sub>1</sub> (L)               | N         | 30               | 30                   | 32             | 32                   | 0.419 [1] |
|                                    | Mean (SD) | 1.18 (0.35)      | -0.025 (0.155)       | 1.32 (0.59)    | -0.054 (0.126)       |           |
|                                    | Median    | 1.18             | -0.035               | 1.11           | -0.065               |           |
|                                    | Min, max  | 0.6, 1.9         | -0.37, 0.29          | 0.7, 2.7       | -0.35, 0.25          |           |
| Achieved MCID $\geq$ 100mL         | Yes       | 9 (30.0%)        |                      | 3 (9.4%)       |                      | 0.040 [2] |
|                                    | No        | 21 (70.0%)       |                      | 29 (90.6%)     |                      |           |
| FVC (L)                            | N         | 30               | 30                   | 32             | 32                   | 0.121 [1] |
|                                    | Mean (SD) | 2.70 (0.65)      | -0.029 (0.335)       | 2.83 (0.96)    | -0.156 (0.304)       |           |
|                                    | Median    | 2.68             | -0.035               | 2.63           | -0.085               |           |
|                                    | Min, max  | 1.5, 4.0         | -0.58, 0.69          | 1.8, 5.5       | -1.03, 0.29          |           |
| FEV <sub>1</sub> /FVC              | N         | 30               | 30                   | 32             | 32                   | 0.748 [1] |
|                                    | Mean (SD) | 0.44 (0.09)      | -0.002 (0.031)       | 0.46 (0.12)    | 0.001 (0.042)        |           |
|                                    | Median    | 0.41             | 0.000                | 0.45           | 0.000                |           |
|                                    | Min, max  | 0.3, 0.7         | -0.06, 0.09          | 0.3, 0.7       | -0.10, 0.11          |           |
| Hb-adjusted DLCO (mL/min/mmHg) [2] | N         | 29               | 28                   | 32             | 32                   | 0.439     |
|                                    | Mean (SD) | 10.05 (3.52)     | -0.56 (2.08)         | 12.82 (5.64)   | -0.13 (2.13)         |           |
|                                    | Median    | 9.28             | -0.29                | 12.16          | 0.19                 |           |
|                                    | Min, max  | 1.28, 18.22      | -5.53, 3.54          | 4.42, 25.12    | -3.47, 6.52          |           |
| <b>Visit 8 (5 months)</b>          |           |                  |                      |                |                      |           |
| FEV <sub>1</sub> (L)               | N         | 28               | 28                   | 31             | 31                   | 0.317 [1] |
|                                    | Mean (SD) | 1.17 (0.39)      | -0.031 (0.125)       | 1.31 (0.58)    | -0.070 (0.161)       |           |
|                                    | Median    | 1.13             | -0.025               | 1.08           | -0.050               |           |
|                                    | Min, max  | 0.6, 1.9         | -0.31, 0.22          | 0.7, 2.7       | -0.43, 0.24          |           |

Online supplements are not copyedited prior to posting.



e-Table 2: Spirometry by Visit (Intent-to-Treat Population)

|                                    |           | PROCHYMAL (n=30) |                      | PLACEBO (n=32) |                      | P-value   |
|------------------------------------|-----------|------------------|----------------------|----------------|----------------------|-----------|
|                                    |           | Actual Value     | Change from baseline | Actual Value   | Change from baseline |           |
| Achieved MCID $\geq$ 100mL         | Yes       | 4 (14.3%)        |                      | 4 (12.9%)      |                      | 0.877 [2] |
|                                    | No        | 24 (85.7%)       |                      | 27 (87.1%)     |                      |           |
| FVC (L)                            | N         | 28               | 28                   | 31             | 31                   | 0.631 [1] |
|                                    | Mean (SD) | 2.64 (0.69)      | -0.075 (0.273)       | 2.88 (0.94)    | -0.117 (0.400)       |           |
|                                    | Median    | 2.63             | 0.015                | 2.84           | -0.050               |           |
|                                    | Min, max  | 1.5, 4.4         | -0.69, 0.31          | 1.4, 5.4       | -1.09, 0.48          |           |
| FEV <sub>1</sub> /FVC              | N         | 28               | 28                   | 31             | 31                   | 0.328 [1] |
|                                    | Mean (SD) | 0.44 (0.10)      | 0.001 (0.039)        | 0.46 (0.12)    | -0.009 (0.040)       |           |
|                                    | Median    | 0.41             | -0.005               | 0.41           | -0.003               |           |
|                                    | Min, max  | 0.3, 0.7         | -0.06, 0.07          | 0.3, 0.7       | -0.10, 0.08          |           |
| Hb-adjusted DLCO (mL/min/mmHg) [2] | N         | 27               | 26                   | 31             | 31                   | 0.672     |
|                                    | Mean (SD) | 10.05 (3.89)     | -0.29 (2.09)         | 13.08 (5.52)   | -0.05 (2.15)         |           |
|                                    | Median    | 9.57             | 0.14                 | 13.03          | -0.47                |           |
|                                    | Min, max  | 2.54, 18.51      | -5.24, 2.70          | 4.89, 24.95    | -4.77, 6.36          |           |
| <b>Visit 9 (6 months)</b>          |           |                  |                      |                |                      |           |
| FEV <sub>1</sub> (L)               | N         | 27               | 27                   | 31             | 31                   | 0.639 [1] |
|                                    | Mean (SD) | 1.19 (0.34)      | -0.28 (0.116)        | 1.37 (0.61)    | -0.010 (0.159)       |           |
|                                    | Median    | 1.14             | 0.010                | 1.25           | -0.010               |           |
|                                    | Min, max  | 0.6, 1.9         | -0.31, 0.16          | 0.7, 2.9       | -0.33, 0.36          |           |
| Achieved MCID $\geq$ 100mL         | Yes       | 2 (7.4%)         |                      | 7 (22.6%)      |                      | 0.111 [2] |
|                                    | No        | 25 (92.6%)       |                      | 24 (77.4%)     |                      |           |
| FVC (L)                            | N         | 27               | 27                   | 31             | 31                   | 0.455 [1] |
|                                    | Mean (SD) | 2.72 (0.53)      | 0.004 (0.224)        | 30.5 (1.12)    | 0.055 (0.275)        |           |
|                                    | Median    | 2.72             | 0.01                 | 2.86           | 0.03                 |           |
|                                    | Min, max  | 1.7, 3.9         | -0.50, 0.49          | 1.6, 6.6       | -0.32, 0.76          |           |
| FEV <sub>1</sub> /FVC              | N         | 27               | 27                   | 31             | 31                   | 0.810 [1] |
|                                    | Mean (SD) | 0.44 (0.09)      | -0.010 (0.039)       | 0.45 (0.13)    | -0.013 (0.040)       |           |
|                                    | Median    | 0.42             | -0.017               | 0.42           | -0.014               |           |
|                                    | Min, max  | 0.3, 0.6         | -0.08, 0.06          | 0.3, 0.7       | -0.12, 0.06          |           |
| Hb-adjusted DLCO (mL/min/mmHg) [2] | N         | 27               | 26                   | 31             | 31                   | 0.338     |
|                                    | Mean (SD) | 10.05 (3.62)     | -0.41 (1.67)         | 13.28 (5.44)   | 0.15 (2.67)          |           |
|                                    | Median    | 9.91             | -0.24                | 13.25          | -0.07                |           |
|                                    | Min, max  | 2.94, 15.75      | -5.73, 3.00          | 4.82, 24.92    | -5.76, 7.17          |           |
| <b>Visit 10 (1 year)</b>           |           |                  |                      |                |                      |           |
| FEV <sub>1</sub> (L)               | N         | 23               | 23                   | 28             | 28                   | 0.175 [1] |
|                                    | Mean (SD) | 1.24 (0.39)      | -0.019 (0.108)       | 1.35 (0.64)    | -0.074 (0.173)       |           |
|                                    | Median    | 1.27             | -0.020               | 1.25           | -0.060               |           |
|                                    | Min, max  | 0.7, 1.9         | -0.26, 0.19          | 0.4, 2.8       | -0.46, 0.21          |           |
| Achieved MCID $\geq$ 100mL         | Yes       | 2 (8.0%)         |                      | 4 (14.3%)      |                      | 0.538 [2] |
|                                    | No        | 21 (84.0%)       |                      | 24 (85.7%)     |                      |           |

Online supplements are not copyedited prior to posting.



e-Table 2: Spirometry by Visit (Intent-to-Treat Population)

|                                    |           | PROCHYMAL (n=30) |                      | PLACEBO (n=32) |                      | P-value   |
|------------------------------------|-----------|------------------|----------------------|----------------|----------------------|-----------|
|                                    |           | Actual Value     | Change from baseline | Actual Value   | Change from baseline |           |
| FVC (L)                            | N         | 23               | 23                   | 28             | 28                   | 0.839 [1] |
|                                    | Mean (SD) | 2.79 (0.67)      | -0.004 (0.251)       | 3.04 (1.15)    | 0.012 (0.301)        |           |
|                                    | Median    | 2.67             | -0.030               | 2.76           | -0.030               |           |
|                                    | Min, max  | 1.8, 4.2         | -0.40, 0.61          | 1.1, 5.6       | -0.70, 0.60          |           |
| FEV <sub>1</sub> /FVC              | N         | 23               | 23                   | 28             | 28                   |           |
|                                    | Mean (SD) | 0.45 (0.11)      | -0.005 (0.037)       | 0.44 (0.13)    | -0.029 (0.043)       |           |
|                                    | Median    | 0.43             | 0.002                | 0.41           | -0.016               |           |
|                                    | Min, max  | 0.7, 1.9         | -0.33, 0.13          | 0.5, 3.0       | -0.64, 0.52          |           |
| Hb-adjusted DLCO (mL/min/mmHg) [2] | N         | 22               | 21                   | 26             | 26                   | 0.179     |
|                                    | Mean (SD) | 10.55 (3.83)     | -0.35 (2.47)         | 15.57 (8.43)   | 1.65 (6.88)          |           |
|                                    | Median    | 10.73            | 0.14                 | 13.85          | -0.10                |           |
|                                    | Min, max  | 2.75, 18.19      | -7.56, 2.92          | 5.63, 46.17    | -1.93, 34.09         |           |
| <b>Visit 11 (2 years)</b>          |           |                  |                      |                |                      |           |
| FEV <sub>1</sub> (L)               | N         | 24               | 23                   | 28             | 28                   | 0.706 [1] |
|                                    | Mean (SD) | 1.16 (0.38)      | -0.103 (0.120)       | 1.30 (0.67)    | -0.121 (0.213)       |           |
|                                    | Median    | 1.16             | -0.090               | 1.19           | -0.115               |           |
|                                    | Min, max  | 0.7, 1.9         | -0.33, 0.13          | 0.5, 3.0       | -0.64, 0.52          |           |
| Achieved MCID $\geq$ 100mL         | Yes       | 1 (4.2%)         |                      | 3 (10.7%)      |                      |           |
|                                    | No        | 22 (91.7%)       |                      | 25 (89.3%)     |                      |           |
| FVC (L)                            | N         | 24               | 23                   | 28             | 28                   | 0.729 [1] |
|                                    | Mean (SD) | 2.70 (0.70)      | -0.080 (0.254)       | 2.98 (1.26)    | -0.048 (0.406)       |           |
|                                    | Median    | 2.60             | -0.110               | 2.71           | -0.095               |           |
|                                    | Min, max  | 1.8, 4.3         | -0.39, 0.72          | 1.1, 7.0       | -0.90, 1.17          |           |
| FEV <sub>1</sub> /FVC              | N         | 24               | 23                   | 28             | 28                   | 0.260 [1] |
|                                    | Mean (SD) | 0.43 (0.10)      | -0.024 (0.035)       | 0.43 (0.13)    | -0.038 (0.054)       |           |
|                                    | Median    | 0.41             | -0.030               | 0.41           | -0.041               |           |
|                                    | Min, max  | 0.3, 0.6         | -0.07, 0.05          | 0.2, 0.7       | -0.18, 0.07          |           |
| Hb-adjusted DLCO (mL/min/mmHg) [2] | N         | 17               | 16                   | 23             | 23                   | 0.356     |
|                                    | Mean (SD) | 10.11 (4.24)     | -0.95 (2.47)         | 12.56 (6.07)   | -0.18 (2.53)         |           |
|                                    | Median    | 10.55            | -0.99                | 11.42          | -0.47                |           |
|                                    | Min, max  | 2.07, 18.99      | -6.71, 3.91          | 3.19, 24.71    | -3.46, 6.11          |           |

The intent-to-treat (ITT) population consisted of all randomized subjects analyzed in the group to which they were randomized, regardless of actual treatment received.

Abbreviations:

FEV<sub>1</sub> = forced expiratory volume in 1 second

FVC = forced vital capacity

Min = minimum

Max = maximum

MCID = minimum clinically important difference

SD = standard deviation

[1] Probability comparing changes from baseline from 2-sided t-test.

[2] Probability from 2-sided chi-square test.

*Online supplements are not copyedited prior to posting.*



Table 3: Oxygen Saturation Pre- and Post-Six-Minute Walk Test by Visit (ITT Set)

| SaO <sub>2</sub> (%)                 | PROCHYMAL (n=30) |             |             |             |             | PLACEBO (n=32) |             |             |             |             |
|--------------------------------------|------------------|-------------|-------------|-------------|-------------|----------------|-------------|-------------|-------------|-------------|
|                                      | Pre-Test         | End of test | 15 min post | 30 min post | 45 min post | Pre-Test       | End of test | 15 min post | 30 min post | 45 min post |
| <b>Baseline (Visit 2, Day 0) [1]</b> |                  |             |             |             |             |                |             |             |             |             |
| n                                    | 30               | 30          | 30          | 29          | 28          | 32             | 32          | 32          | 32          | 32          |
| Mean (SD)                            | 95.1 (2.52)      | 90.3 (5.28) | 95.1 (3.22) | 95.3 (2.71) | 95.6 (2.71) | 94.5 (2.05)    | 91.8 (3.80) | 94.5 (3.04) | 95.3 (2.51) | 95.0 (2.68) |
| Median                               | 95.5             | 91.0        | 96.0        | 96.0        | 96.0        | 94.0           | 92.0        | 95.0        | 95.0        | 94.5        |
| Min, max                             | 90, 98           | 75, 98      | 83, 99      | 90, 99      | 91, 100     | 90, 99         | 85, 98      | 89, 100     | 91, 99      | 91, 100     |
| <b>Visit 3 (Day 10)</b>              |                  |             |             |             |             |                |             |             |             |             |
| n                                    | 30               | 30          | 30          | 30          | 30          | 32             | 32          | 32          | 32          | 32          |
| Mean (SD)                            | 94.5 (2.42)      | 90.7 (4.68) | 94.2 (3.02) | 95.2 (2.25) | 95.2 (2.60) | 94.1 (2.49)    | 90.5 (5.05) | 94.1 (2.76) | 94.3 (2.43) | 94.7 (2.02) |
| Median                               | 94.0             | 91.0        | 94.5        | 95.5        | 95.0        | 94.0           | 91.0        | 94.0        | 94.0        | 95.0        |
| Min, max                             | 91, 99           | 81, 98      | 88, 99      | 91, 99      | 90, 99      | 90, 99         | 78, 98      | 87, 100     | 90, 99      | 91, 98      |
| <b>Visit 4 (1 month)</b>             |                  |             |             |             |             |                |             |             |             |             |
| n                                    | 30               | 30          | 30          | 30          | 29          | 32             | 32          | 32          | 32          | 32          |
| Mean (SD)                            | 94.1 (1.92)      | 89.7 (4.35) | 94.1 (2.35) | 94.9 (2.66) | 94.4 (2.89) | 94.4 (2.17)    | 91.8 (3.70) | 95.0 (3.04) | 95.1 (2.72) | 95.2 (2.90) |
| Median                               | 94.0             | 90.0        | 94.0        | 95.0        | 95.0        | 94.0           | 91.5        | 95.0        | 95.0        | 95.0        |
| Min, max                             | 90, 98           | 80, 97      | 90, 100     | 90, 100     | 90, 100     | 90, 98         | 84, 98      | 88, 100     | 90, 100     | 89, 100     |
| <b>Visit 5 (2 months)</b>            |                  |             |             |             |             |                |             |             |             |             |
| n                                    | 30               | 30          | 30          | 30          | 30          | 32             | 32          | 32          | 32          | 32          |
| Mean (SD)                            | 94.2 (2.27)      | 89.9 (4.35) | 94.9 (2.68) | 95.6 (2.66) | 94.6 (2.83) | 94.4 (2.21)    | 90.3 (5.37) | 94.6 (2.41) | 95.2 (2.57) | 95.3 (2.36) |
| Median                               | 93.5             | 90.5        | 94.5        | 95.5        | 95.0        | 94.0           | 91.0        | 94.0        | 95.0        | 95.5        |
| Min, max                             | 91, 98           | 80, 96      | 89, 99      | 91, 100     | 88, 100     | 91, 100        | 71, 98      | 90, 99      | 90, 100     | 90, 100     |
| <b>Visit 6 (3 months)</b>            |                  |             |             |             |             |                |             |             |             |             |
| n                                    | 30               | 30          | 30          | 30          | 30          | 32             | 32          | 32          | 32          | 32          |
| Mean (SD)                            | 94.2 (3.20)      | 90.3 (4.55) | 95.1 (3.14) | 95.0 (2.47) | 95.6 (2.51) | 94.7 (2.39)    | 91.0 (4.45) | 95.5 (2.33) | 95.3 (3.25) | 95.3 (4.04) |
| Median                               | 95.0             | 90.0        | 96.0        | 95.0        | 96.0        | 95.0           | 91.5        | 96.0        | 95.5        | 95.5        |
| Min, max                             | 92, 98           | 77, 98      | 89, 100     | 90, 100     | 90, 100     | 91, 99         | 82, 98      | 90, 99      | 83, 100     | 78, 100     |
| <b>Visit 7 (4 months)</b>            |                  |             |             |             |             |                |             |             |             |             |
| n                                    | 30               | 30          | 30          | 30          | 30          | 32             | 32          | 32          | 32          | 32          |
| Mean (SD)                            | 94.5 (2.45)      | 89.2 (4.85) | 94.7 (2.80) | 94.5 (3.27) | 95.3 (2.96) | 94.4 (1.95)    | 91.3 (5.17) | 94.6 (2.42) | 94.6 (1.72) | 94.5 (2.69) |
| Median                               | 94.5             | 90.0        | 95.0        | 95.0        | 95.5        | 94.5           | 91.5        | 94.0        | 94.5        | 94.5        |
| Min, max                             | 88, 98           | 79, 98      | 88, 99      | 84, 99      | 86, 100     | 91, 98         | 76, 100     | 90, 99      | 91, 99      | 86, 99      |
| <b>Visit 8 (5 months)</b>            |                  |             |             |             |             |                |             |             |             |             |
| n                                    | 27               | 27          | 27          | 27          | 27          | 30             | 30          | 30          | 30          | 30          |
| Mean (SD)                            | 94.1 (2.28)      | 91.3 (4.36) | 94.0 (5.40) | 94.0 (5.40) | 94.5 (3.64) | 94.6 (2.74)    | 91.7 (4.66) | 95.0 (2.24) | 94.9 (2.80) | 94.8 (2.88) |
| Median                               | 94.0             | 91.0        | 95.0        | 95.0        | 94.0        | 94.5           | 93.0        | 95.0        | 95.0        | 95.0        |
| Min, max                             | 90, 99           | 81, 99      | 70, 99      | 70, 99      | 81, 99      | 88, 99         | 81, 98      | 90, 99      | 84, 99      | 84, 99      |
| <b>Visit 9 (6 months)</b>            |                  |             |             |             |             |                |             |             |             |             |
| n                                    | 27               | 27          | 27          | 27          | 27          | 31             | 31          | 31          | 31          | 31          |
| Mean (SD)                            | 95.1 (2.25)      | 89.4 (6.28) | 94.4 (3.30) | 95.5 (2.28) | 95.4 (2.31) | 94.9 (2.19)    | 91.2 (4.15) | 95.2 (2.73) | 95.2 (2.54) | 95.8 (2.66) |
| Median                               | 95.0             | 91.0        | 95.0        | 96.0        | 96.0        | 95.0           | 91.0        | 95.0        | 96.0        | 96.0        |
| Min, max                             | 91, 99           | 75, 98      | 86, 99      | 90, 99      | 91, 99      | 90, 98         | 84, 99      | 87, 99      | 86, 98      | 85, 100     |
| <b>Visit 10 (1 year)</b>             |                  |             |             |             |             |                |             |             |             |             |
| n                                    | 22               | 22          | 22          | 22          | 22          | 26             | 26          | 26          | 26          | 26          |
| Mean (SD)                            | 94.9 (2.29)      | 91.8 (5.19) | 93.9 (4.81) | 94.5 (2.69) | 95.1 (2.97) | 95.0 (2.05)    | 92.1 (4.90) | 94.3 (3.09) | 93.9 (3.93) | 94.5 (3.59) |
| Median                               | 94.5             | 91.5        | 94.0        | 94.0        | 95.0        | 95.0           | 93.0        | 94.0        | 95.0        | 95.5        |
| Min, max                             | 91, 98           | 81, 98      | 76, 100     | 86, 98      | 86, 100     | 91, 98         | 78, 98      | 84, 99      | 82, 98      | 83, 98      |
| <b>Visit 11 (2 years)</b>            |                  |             |             |             |             |                |             |             |             |             |
| n                                    | 20               | 20          | 20          | 20          | 20          | 27             | 27          | 27          | 27          | 27          |
| Mean (SD)                            | 96.0 (2.20)      | 89.9 (4.56) | 96.0 (2.48) | 95.1 (2.45) | 95.6 (2.09) | 95.5 (2.31)    | 90.6 (4.23) | 94.3 (2.92) | 94.5 (2.05) | 95.0 (1.91) |
| Median                               | 96.5             | 90.0        | 97.0        | 95.5        | 96.5        | 96.0           | 92.0        | 95.0        | 95.0        | 95.0        |
| Min, max                             | 90, 99           | 77, 96      | 89, 99      | 90, 98      | 91, 98      | 92, 98         | 82, 97      | 85, 97      | 90, 98      | 90, 97      |

Notes: The intent-to-treat (ITT) set consists of all randomized subjects analyzed in the group to which they were randomized, regardless of actual treatment received.

Min=minimum; max=maximum; min=minutes; SaO<sub>2</sub>=oxygen saturation; SD=standard deviation

[1] Baseline is immediately pre-dose.

*Online supplements are not copyedited prior to posting.*



**g-Table 4: Cytokine and C-reactive Protein Assays by Visit (Intent-to-Treat Population)**

|                                  |           | PROCHYMAL (n=30) |                      | PLACEBO (n=32) |                      | P-value [1] |
|----------------------------------|-----------|------------------|----------------------|----------------|----------------------|-------------|
|                                  |           | Actual Value     | Change from baseline | Actual Value   | Change from baseline |             |
| <b>Baseline (Visit 2, Day 0)</b> |           |                  |                      |                |                      |             |
| C-reactive protein (hs)          | N         | 30               |                      | 32             |                      |             |
|                                  | Mean (SD) | 7.55 (12.83)     |                      | 6.38 (7.90)    |                      |             |
|                                  | Median    | 2.59             |                      | 5.20           |                      |             |
|                                  | Min, max  | 0.6, 62.9        |                      | 0.4, 43.2      |                      |             |
| <b>Visit 3 (Day 10)</b>          |           |                  |                      |                |                      |             |
| C-reactive protein (hs)          | N         | 30               | 30                   | 32             | 32                   | 0.886       |
|                                  | Mean (SD) | 6.87 (13.23)     | -0.68 (15.69)        | 6.17 (6.32)    | -0.20 (9.50)         |             |
|                                  | Median    | 2.92             | -0.04                | 4.51           | 0.09                 |             |
|                                  | Min, max  | 0.6, 72.1        | -41.4, 63.2          | 0.4, 25.0      | -41.7, 19.0          |             |
| <b>Visit 4 (1 Month)</b>         |           |                  |                      |                |                      |             |
| C-reactive protein (hs)          | N         | 30               | 30                   | 32             | 32                   | 0.307       |
|                                  | Mean (SD) | 4.97 (3.95)      | -2.58 (10.80)        | 6.58 (7.63)    | 0.20 (10.45)         |             |
|                                  | Median    | 3.23             | -0.13                | 4.44           | 0.23                 |             |
|                                  | Min, max  | 0.7, 13.6        | -49.9, 12.8          | 0.3, 32.4      | -41.7, 24.5          |             |
| <b>Visit 5 (2 Months)</b>        |           |                  |                      |                |                      |             |
| C-reactive protein (hs)          | N         | 30               | 30                   | 32             | 32                   | 0.929       |
|                                  | Mean (SD) | 5.57 (8.09)      | -1.98 (8.09)         | 4.68 (4.31)    | -1.70 (8.15)         |             |
|                                  | Median    | 2.80             | -0.32                | 3.61           | -0.12                |             |
|                                  | Min, max  | 0.3, 38.6        | -58.1, 37.9          | 0.3, 17.8      | -39.9, 11.0          |             |
| <b>Visit 6 (3 Months)</b>        |           |                  |                      |                |                      |             |
| C-reactive protein (hs)          | N         | 30               | 30                   | 32             | 32                   | 0.968       |
|                                  | Mean (SD) | 4.94 (5.06)      | -2.61 (13.16)        | 3.88 (3.01)    | -2.50 (7.77)         |             |
|                                  | Median    | 2.78             | -0.09                | 3.59           | -0.23                |             |
|                                  | Min, max  | 0.5, 23.8        | -58.4, 21.7          | 0.5, 12.9      | -41.1, 3.1           |             |
| <b>Visit 7 (4 Months)</b>        |           |                  |                      |                |                      |             |
| C-reactive protein (hs)          | N         | 29               | 29                   | 32             | 32                   | 0.934       |
|                                  | Mean (SD) | 6.68 (13.63)     | -0.99 (7.20)         | 5.22 (4.91)    | -1.16 (8.60)         |             |
|                                  | Median    | 3.03             | -0.18                | 3.47           | 0.00                 |             |
|                                  | Min, max  | 0.4, 74.3        | -34.0, 11.4          | 0.2, 20.3      | -40.1, 15.3          |             |
| <b>Visit 8 (5 Months)</b>        |           |                  |                      |                |                      |             |
| C-reactive protein (hs)          | N         | 28               | 28                   | 31             | 31                   | 0.253       |
|                                  | Mean (SD) | 4.24 (3.98)      | -3.58 (13.17)        | 7.03 (13.82)   | 0.75 (15.38)         |             |
|                                  | Median    | 3.03             | -0.10                | 3.50           | -0.02                |             |
|                                  | Min, max  | 0.6, 17.7        | -59.6, 5.0           | 0.3, 76.3      | -41.4, 68.2          |             |
| <b>Visit 9 (6 Months)</b>        |           |                  |                      |                |                      |             |
| C-reactive protein (hs)          | N         | 27               | 27                   | 31             | 31                   | 0.686       |
|                                  | Mean (SD) | 9.76 (12.77)     | 2.03 (19.01)         | 6.56 (12.45)   | 0.28 (13.58)         |             |
|                                  | Median    | 4.39             | -0.16                | 4.00           | -0.06                |             |
|                                  | Min, max  | 0.4, 44.4        | -53.7, 42.9          | 0.3, 68.9      | -41.6, 60.7          |             |
| <b>Visit 10 (1 Year)</b>         |           |                  |                      |                |                      |             |
| C-reactive protein (hs)          | N         | 25               | 25                   | 28             | 28                   | 0.908       |
|                                  | Mean (SD) | 5.63 (5.97)      | -2.53 (13.34)        | 3.42 (3.12)    | -2.88 (8.34)         |             |
|                                  | Median    | 2.90             | 0.22                 | 2.12           | -0.74                |             |
|                                  | Min, max  | 0.4, 21.7        | -53.7, 19.3          | 0.3, 11.2      | -41.3, 3.5           |             |
| <b>Visit 11 (2 Years)</b>        |           |                  |                      |                |                      |             |
| C-reactive protein (hs)          | N         | 19               | 19                   | 26             | 26                   | 0.732       |
|                                  | Mean (SD) | 5.68 (5.20)      | -3.38 (13.11)        | 4.26 (5.07)    | -2.22 (9.32)         |             |
|                                  | Median    | 4.82             | -0.07                | 2.44           | -0.61                |             |
|                                  | Min, max  | 0.5, 20.4        | -42.5, 9.7           | 0.2, 22.2      | -41.0, 14.7          |             |

**Notes:** The intent-to-treat (ITT) set consists of all randomized subjects analyzed in the group to which they were randomized, regardless of actual treatment received.

Min = minimum; max = maximum; SD = standard deviation; TGF = transforming growth factor.

[1] Probability comparing changes from baseline from two-sided t-tests.

*Online supplements are not copyedited prior to posting.*
